# Supplementary material for: Effect of different pyrolysis temperatures on physico-chemical characteristics and lead(ii) removal of biochar derived from chicken manure
Source: Royal Society of Chemistry journal article supplement (doi:10.1039/c9ra08199b), 2020-01-01
Supplement: c9ra08199b1.pdf [file c9ra08199b1.pdf]

### Supplementary materials.

Table S1 EDS elemental composition analysis tables of CMBs before and after Pb<sup>2+</sup> reaction.

|                    | Sample    | C     | N     | O     | Ca    | K    | Pb    |
|--------------------|-----------|-------|-------|-------|-------|------|-------|
| before<br>reaction | CMB200(a) | 9.03  | 2.41  | 20.36 | 65.75 | 1.44 | /     |
|                    | CMB400(b) | 14.57 | 3.87  | 15.14 | 61.04 | 5.38 | /     |
|                    | CMB600(c) | 14.78 | 17.49 | 10.1  | 57.63 | /    | /     |
|                    | CMB800(d) | 43.42 | 3.39  | 13.76 | 31.71 | 7.68 | /     |
| after<br>reaction  | CMB200(e) | 5.63  | 12.09 | 23.41 | 26.7  | /    | 4.88  |
|                    | CMB400(f) | 19.47 | 4.69  | 15.43 | 48.38 | /    | 10.55 |
|                    | CMB600(g) | 41.98 | 16.85 | 10.79 | 23.82 | /    | 16.56 |
|                    | CMB800(h) | 18.32 | 4.38  | 8.78  | 62.33 | 5.84 | 20.30 |
